# Supplementary material for: Associations between Nausea, Vomiting, Fatigue and Health-Related Quality of Life of Women in Early Pregnancy: The Generation R Study
Source: PubMed Central journal article supplement (PMC5096665; doi:10.1371/journal.pone.0166133), 2016-11-04
Supplement: pone.0166133.s002.pdf [file pone.0166133.s002.pdf]

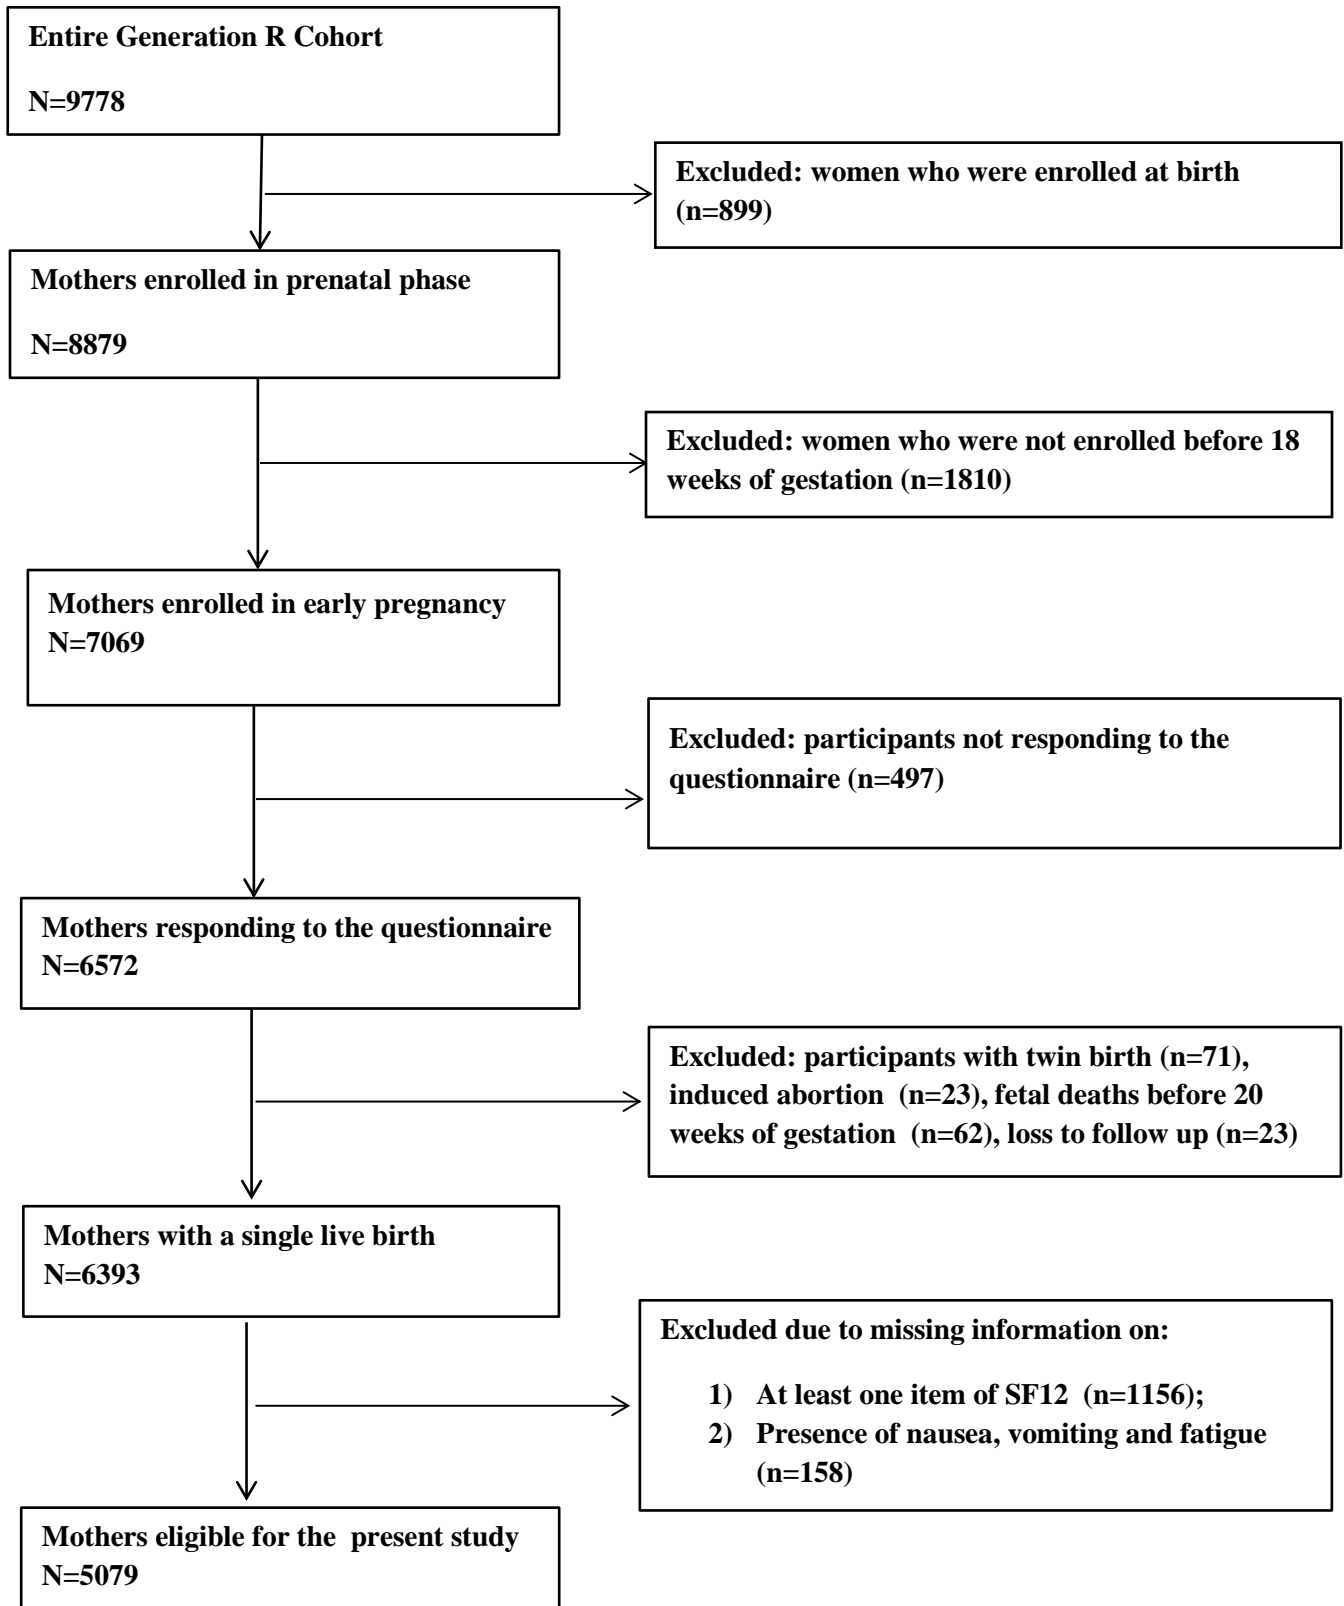

Fig S1. Flow chart of population for analysis in this study
